# Supplementary material for: Chemical probing of HER2-amplified cancer cells identifies TORC2 as a particularly effective secondary target for combination with lapatinib
Source: PubMed Central journal article supplement (PMC4747394; doi:10.18632/oncotarget.5660), 2015-10-14
Supplement: oncotarget-06-41123-s001.pdf [file oncotarget-06-41123-s001.pdf]

## SUPPLEMENTARY FIGURES AND TABLES

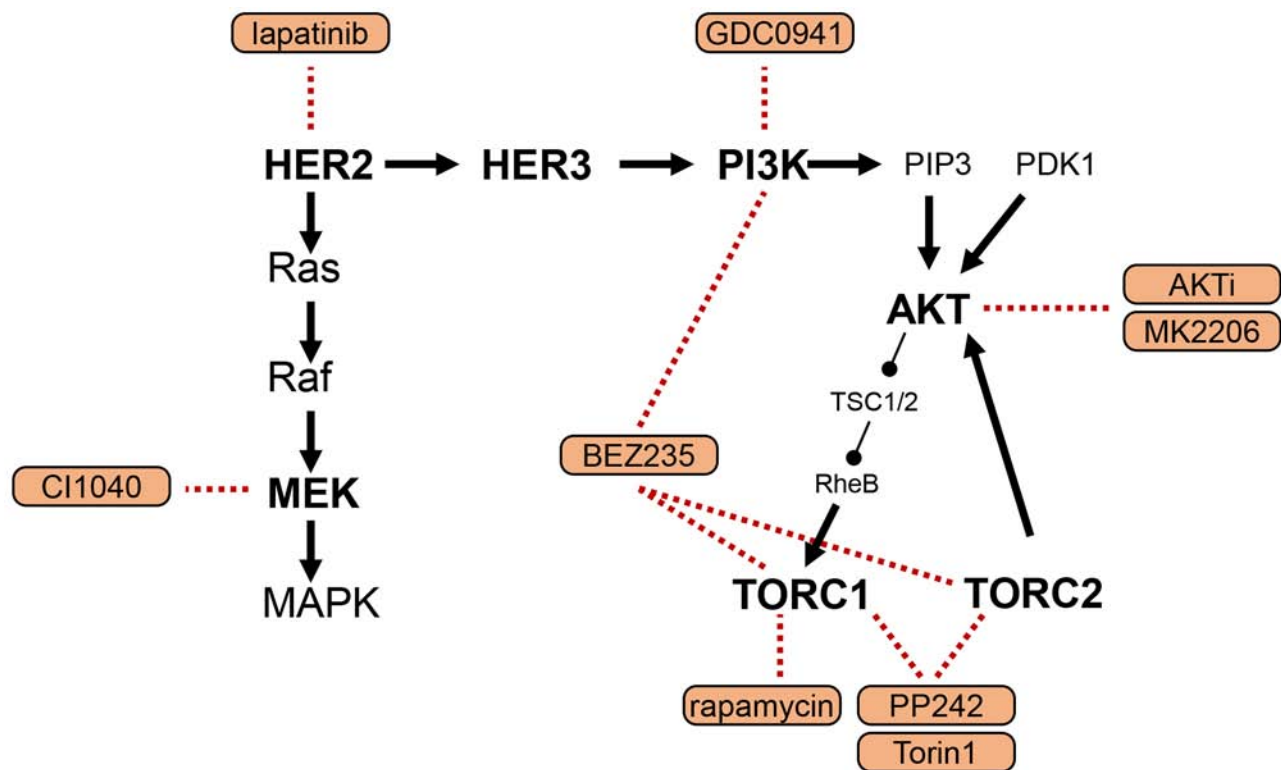

| Drug      | Reference                                                      |
|-----------|----------------------------------------------------------------|
| lapatinib | Rusnak et al, Mol Cancer Ther 2001; 1: 85-94.                  |
| GDC0941   | Folkes et al, J Med Chem 2008; 51: 5522-32.                    |
| BEZ235    | Maira et al, Mol Cancer Ther 2008; 7: 1851-63.                 |
| Akti      | Zhao et al, Bioorg Med Chem Lett 2008; 18: 49-53.              |
| MK2206    | Yan. Cancer Res 2009; 69; abstract DDT01-1                     |
| rapamycin | reviewed in Faivre et al, Nat Rev Drug Discov 2006; 5: 671-88. |
| PP242     | Feldman et al, PLoS Biol 2009; 7: e38                          |
| Torin1    | Liu et al, J Med Chem 2010; 53: 7146-55.                       |
| CI1040    | Bioorg Med Chem Lett 2008; 18: 6501-4.                         |

**Supplementary Figure S1: Schematic depicting the general outline of the signaling pathway downstream of HER2-HER3 and the kinases targeted by the individual drugs.** Readers are referred to the following references for the biochemical properties and available kinase profiling data for each of these drugs.

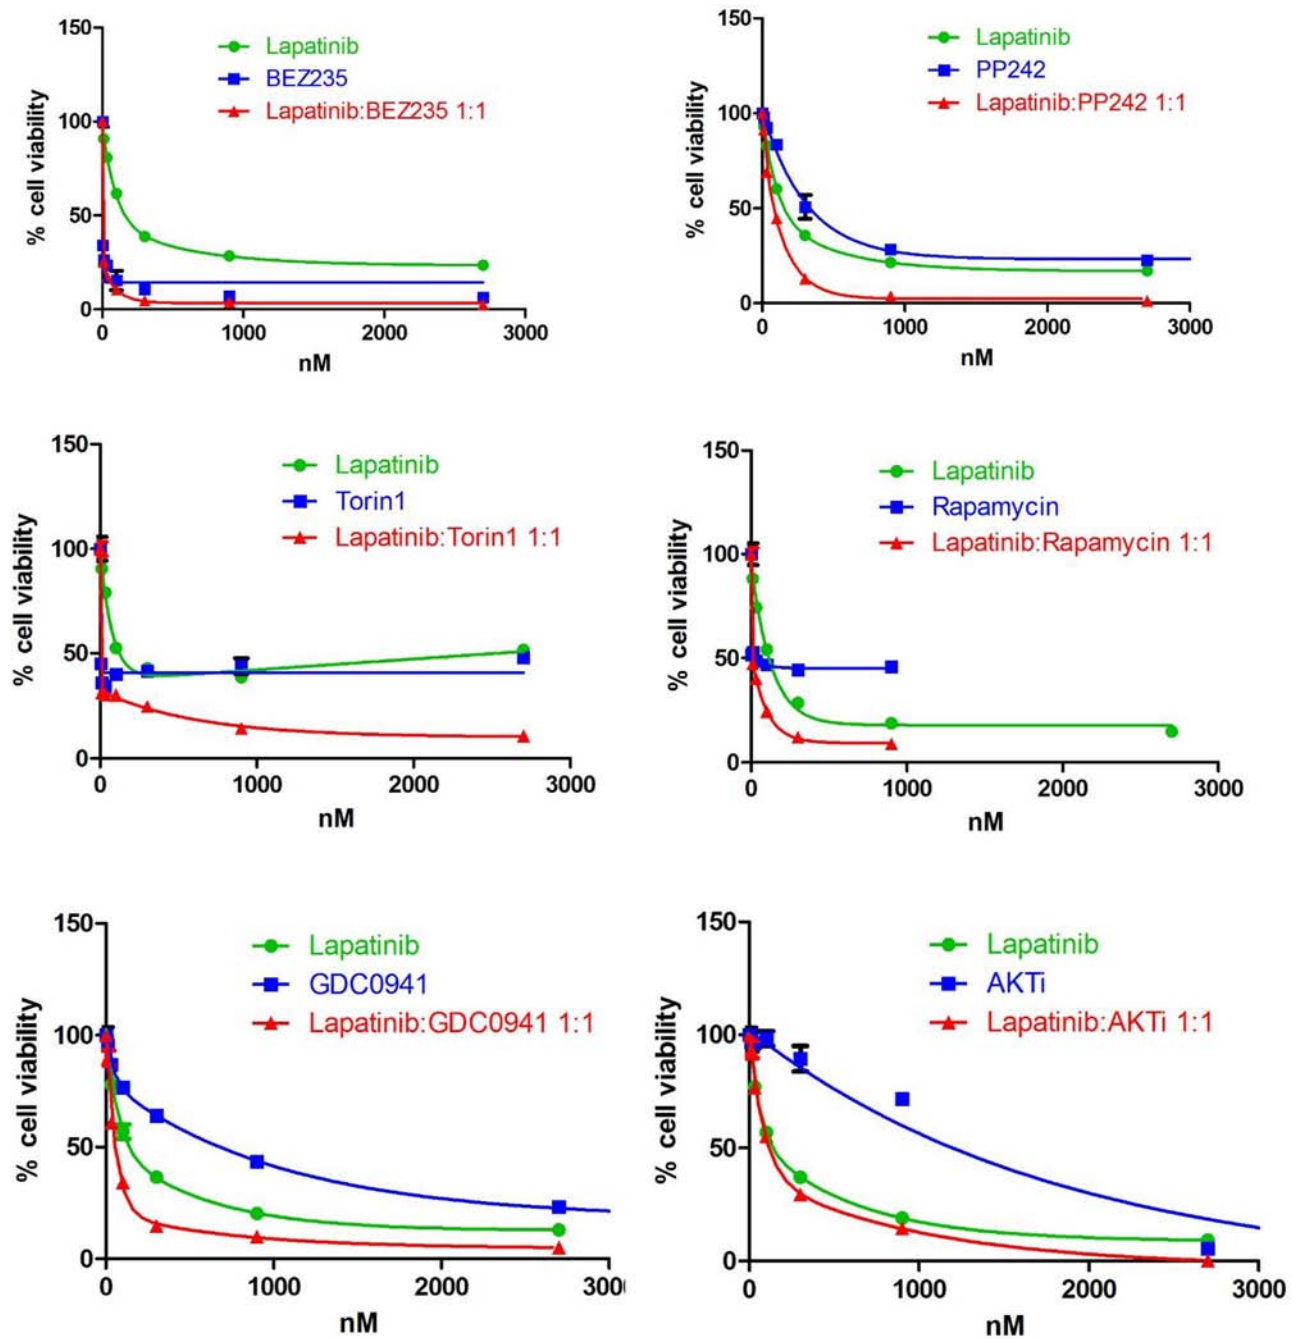

**Supplementary Figure S2: Growth assays were done in matrix format.** SkBr3 cells (2000/well) were plated in 96 well plates and were allowed to adhere overnight. The cells were treated with increasing doses of the indicated in a 3-fold increasing matrix format. Cell viability was determined at 72 hours by MTT assay. The percentage absorbance upon treatment compared to DMSO treatment is reported as an average of triplicates.

### 3:1 drug ratio (lapatinib:drug 2)

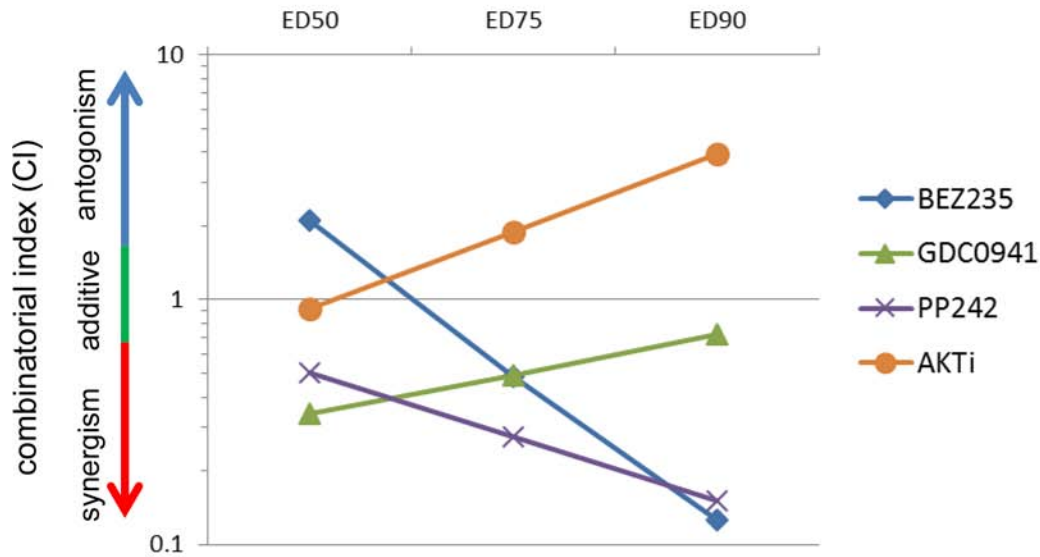

### 1:3 drug ratio (lapatinib:drug 2)

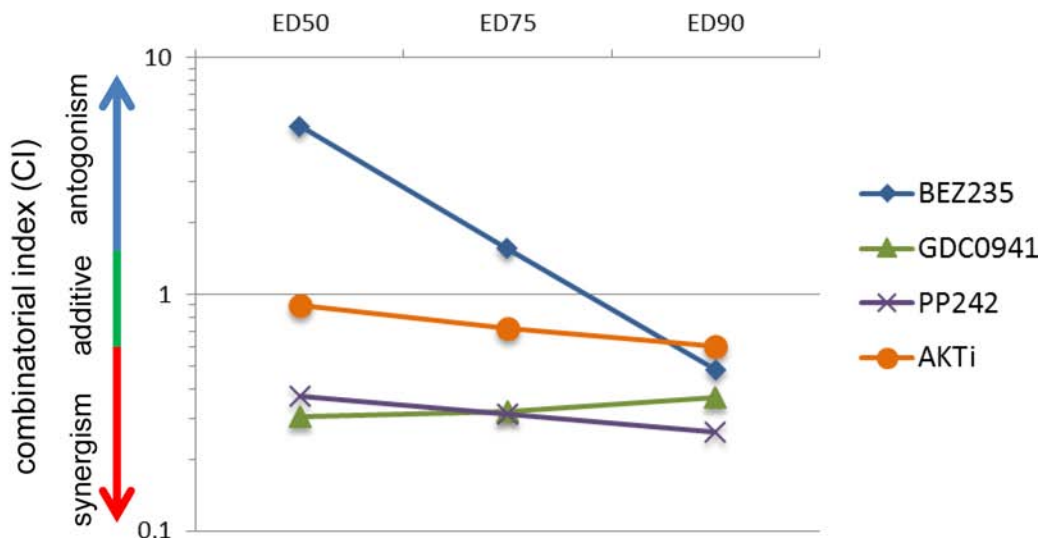

**Supplementary Figure S3: Growth assays were done in matrix format.** SkBr3 cells (2000/well) were plated in 96 well plates and were allowed to adhere overnight. The cells were treated with increasing doses of the indicated in a 3-fold increasing matrix format. Cell viability was determined at 72 hours by MTT assay. The percentage absorbance upon treatment compared to DMSO treatment is reported as an average of triplicates. The drugs were at fixed ratios of 1:3 or 3:1 for lapatinib:drugX. The Calcsynsoftware analyses for synergy, additivity or antagonism between two drug combinations based on the Chou & Talay methodology.

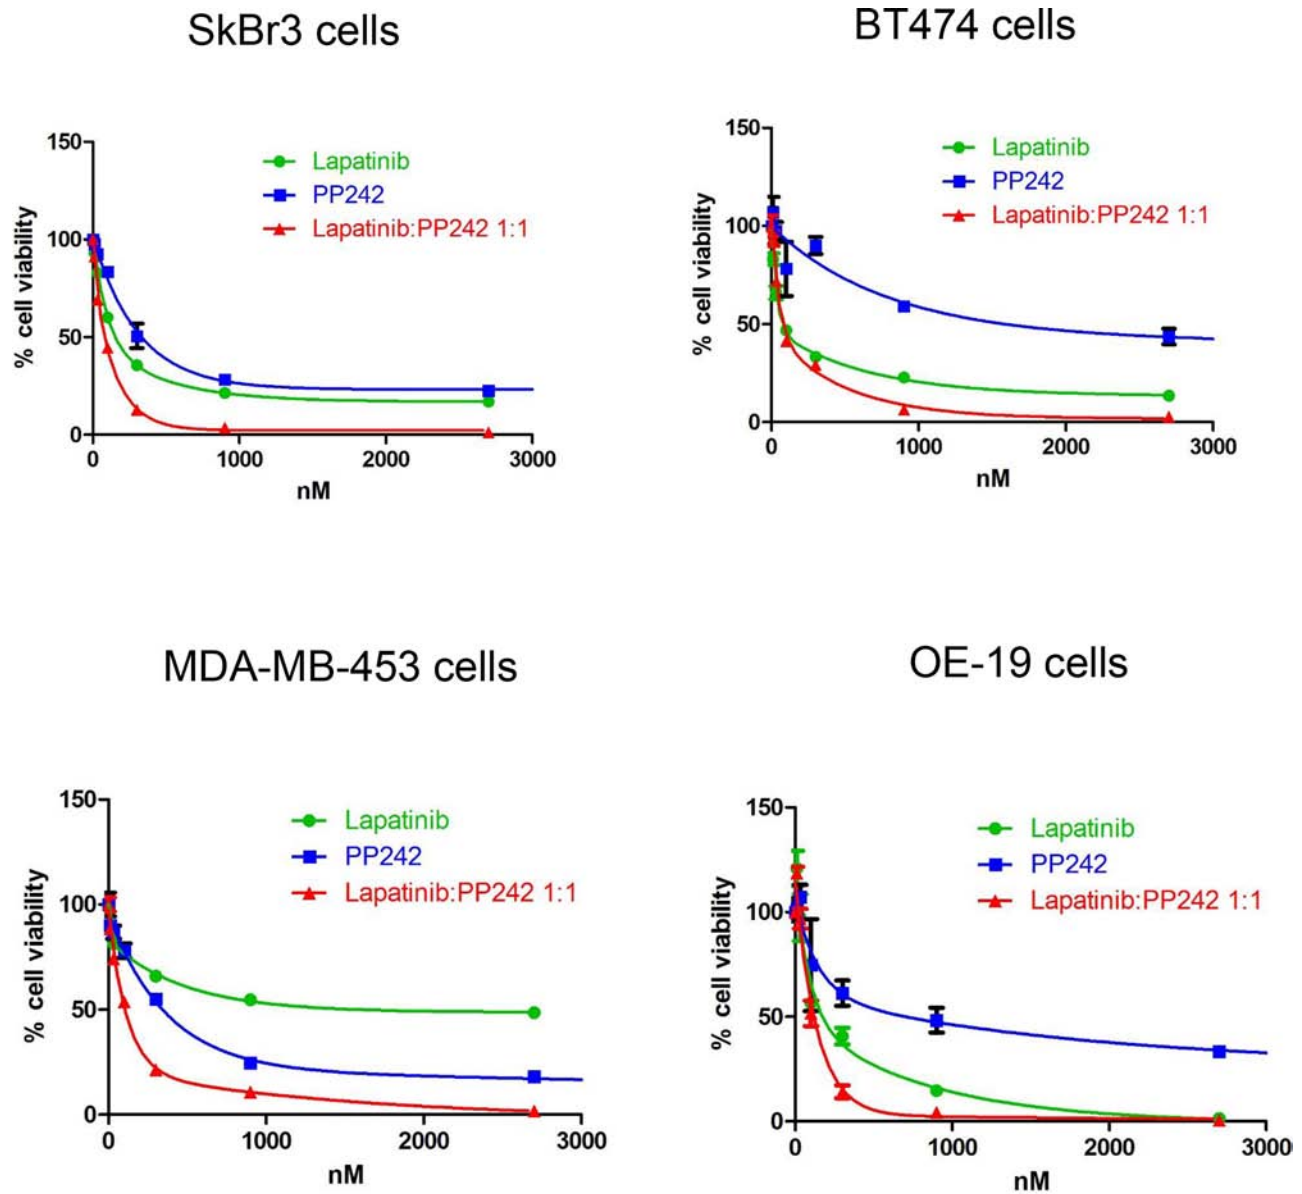

**Supplementary Figure S4: Growth assays were done in matrix format for the indicated four cell types.** Cells were treated with increasing doses of the indicated in a 3-fold increasing matrix format. Cell viability was determined at 72 hours by MTT assay. The percentage absorbance upon treatment compared to DMSO treatment is reported as an average of triplicates.

Time course of knockdown of Rictor and Raptor in SkBr3 cells following doxycycline induced shRNA

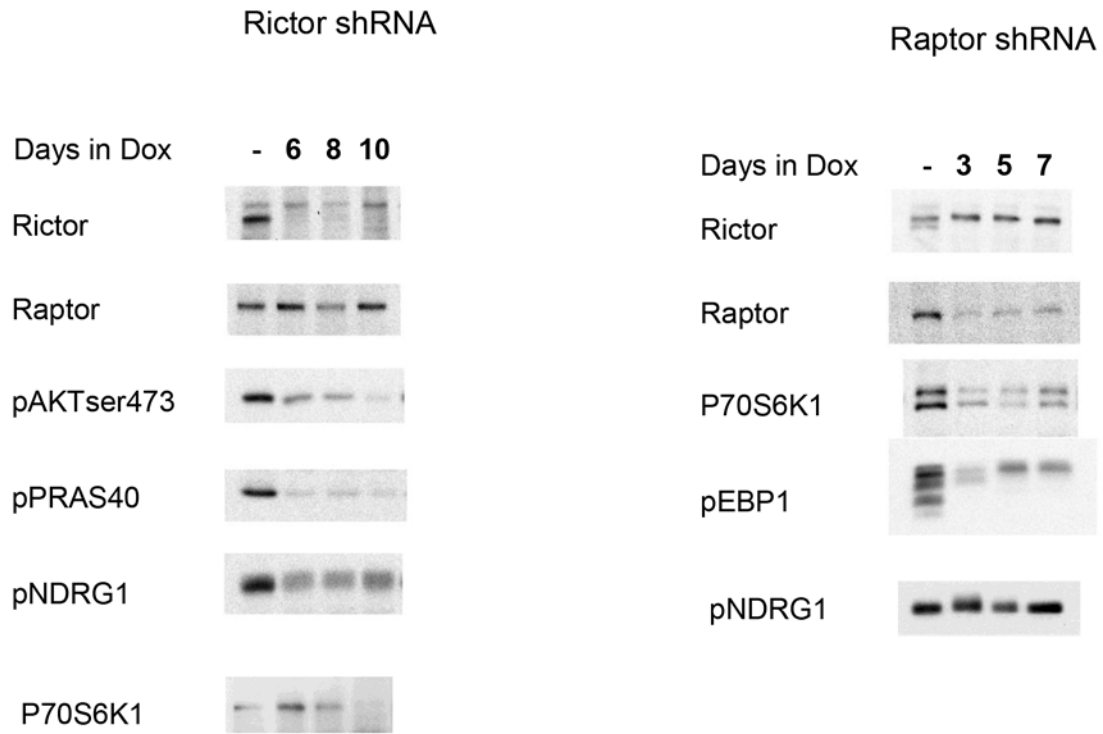

Supplementary Figure S5: SkBr3 cells engineered to induce either Rictor shRNA or Raptor shRNA were treated with 200 ng/ml doxycycline for the indicated number of days and cell lysates immunoblotted using the indicated antibodies.

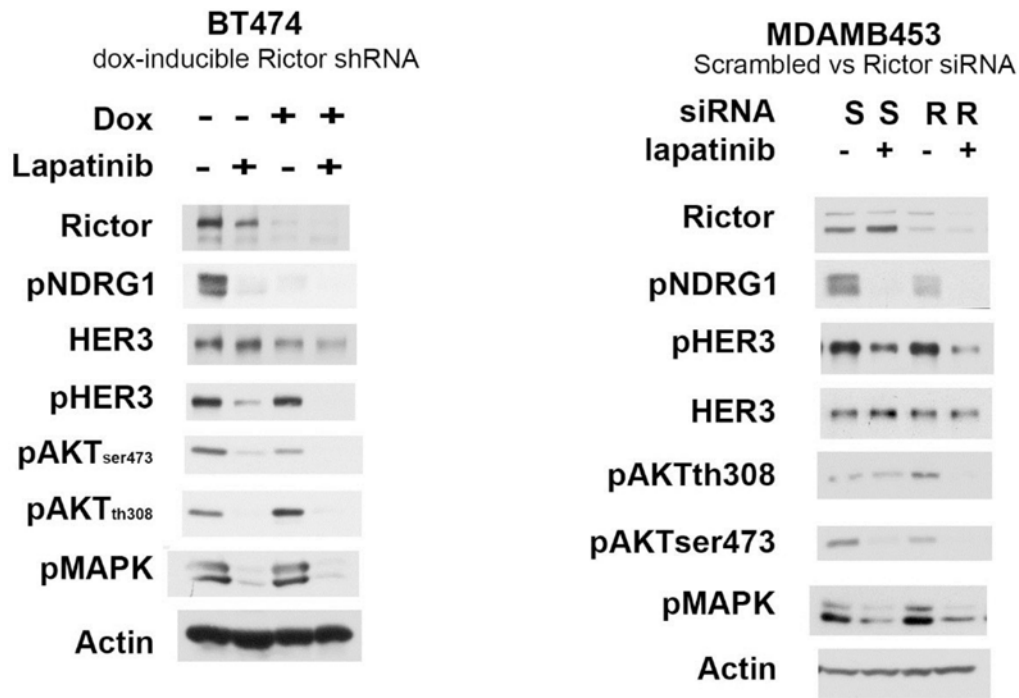

**Supplementary Figure S6: Rictor knockdown inhibits the compensatory upregulation of HER3 and downstream signaling in BT474 and MDA-453 cells.** BT474 cells were stably transfected with a dox-inducible Rictor shRNA construct and treated with 200 nM lapatinib for 72 hours following the dox-induced knockdown of Rictor. MDA-MB-453 cells were transiently transfected with Rictor scrambled siRNA and treated with 200 nM lapatinib for 72 hours.

**Supplementary Table S1: IC50 values determined form curve fit of dose response for each drug**

| <b>Drug</b> | <b>IC50 (nM)</b> |
|-------------|------------------|
| lapatinib   | 243              |
| GDC0941     | 601              |
| BEZ235      | 42               |
| AKTi        | 280              |
| MK2206      | >8100            |
| PP242       | 495              |
| Torin1      | <3               |
| Rapamycin   | 26               |
| CI1040      | 1240             |
